# Supplementary material for: Insulin controls food intake and energy balance via NPY neurons
Source: PubMed Central journal article supplement — Mol Metab. 2017 Apr 12;6(6):574–84. doi: 10.1016/j.molmet.2017.03.013 (PMC5444095; doi:10.1016/j.molmet.2017.03.013), 2017-04-12

A

| Breeding Pair                                                                   | N                | Litter size | Genotype Frequency    |                                             | Male offsprings | Female offsprings |
|---------------------------------------------------------------------------------|------------------|-------------|-----------------------|---------------------------------------------|-----------------|-------------------|
|                                                                                 |                  |             | IR <sup>lox/lox</sup> | IR <sup>lox/lox</sup> ;NPY <sup>Cre/+</sup> |                 |                   |
| Female IR <sup>lox/lox</sup> X Male IR <sup>lox/lox</sup> ;NPY <sup>Cre/+</sup> | 7 breeding pairs | 5.85 ± 0.40 | 20                    | 21                                          | 53.60%          | 46.40%            |
| Male IR <sup>lox/lox</sup> X Female IR <sup>lox/lox</sup> ;NPY <sup>Cre/+</sup> | 7 breeding pairs | 6.00 ± 0.37 | 19                    | 23                                          | 47.61%          | 52.39%            |

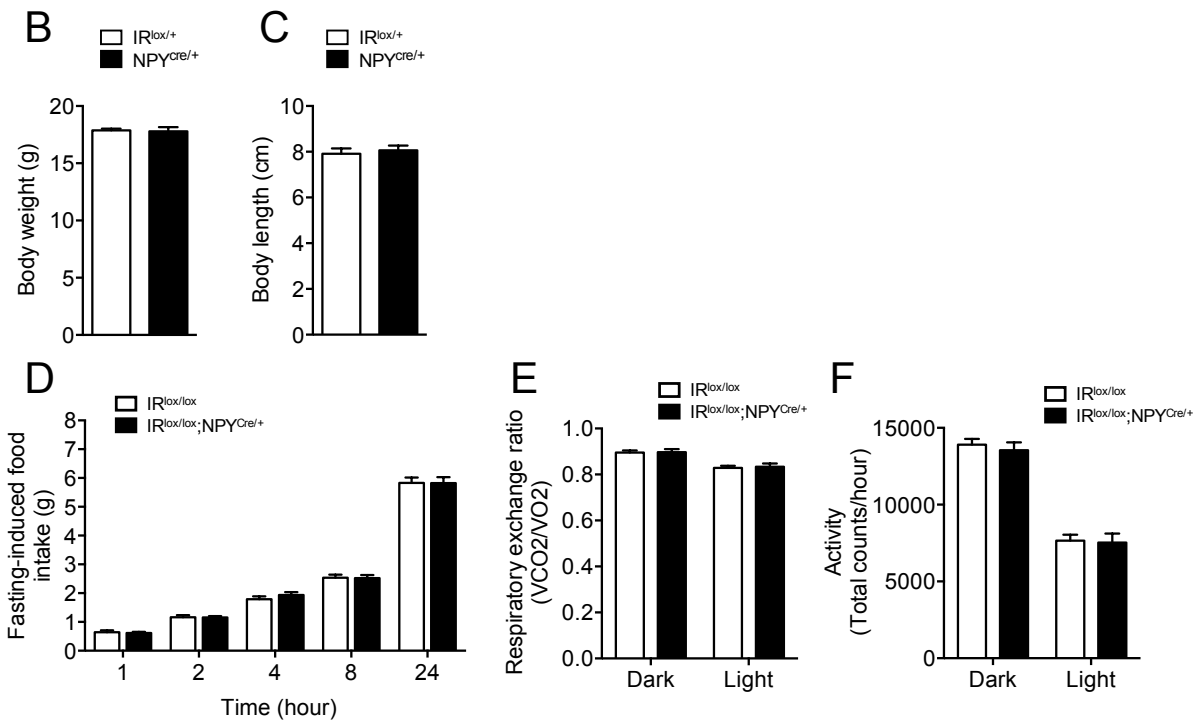

Supplement: mmc3.pdf [file mmc3.pdf]
