# Supplementary material for: Insulin controls food intake and energy balance via NPY neurons
Source: PubMed Central journal article supplement — Mol Metab. 2017 Apr 12;6(6):574–84. doi: 10.1016/j.molmet.2017.03.013 (PMC5444095; doi:10.1016/j.molmet.2017.03.013), 2017-04-12

A

Basal and Clamp parameters in chow fed IR<sup>lox/lox</sup> and IR<sup>lox/lox</sup>;NPY<sup>Cre/+</sup> mice.

|                               | IR <sup>lox/lox</sup> | IR <sup>lox/lox</sup> ;NPY <sup>Cre/+</sup> |
|-------------------------------|-----------------------|---------------------------------------------|
| Blood Glucose (mM)            |                       |                                             |
| Basal                         | 7.8 ± 0.6             | 8.0 ± 0.4                                   |
| Clamp                         | 7.8 ± 0.3             | 8.1 ± 0.3                                   |
| Plasma Insulin (μU/ml)        |                       |                                             |
| Basal                         | 14.4 ± 3.9            | 14.5 ± 1.4                                  |
| Clamp                         | 61.1 ± 6.5 *          | 67.1 ± 6.4 *                                |
| Plasma NEFA (mM)              |                       |                                             |
| Basal                         | 1.12 ± 0.22           | 1.30 ± 0.16                                 |
| Clamp                         | 0.24 ± 0.06 *         | 0.30 ± 0.04 *                               |
| GIR (mg/min/kg)               | 56.8 ± 5.0            | 44.9 ± 1.7 ‡                                |
| Liver Triglyceride (μmol/g)   | 13.3 ± 3.8            | 11.8 ± 1.5                                  |
| Muscle Triglycerides (μmol/g) | 7.0 ± 1.0             | 10.1 ± 0.8 ‡                                |

Values mean ± SEM. IR<sup>lox/lox</sup> n=5; IR<sup>lox/lox</sup>;NPY<sup>Cre/+</sup> n=7. \* p<0.05 different to basal period. ‡ p<0.05 different to IR<sup>lox/lox</sup>.

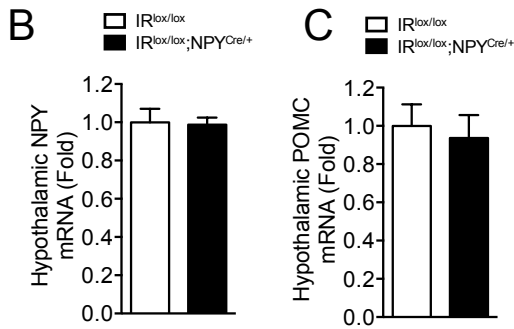

Supplement: mmc5.pdf [file mmc5.pdf]
