# Supplementary figures and images for: Insulin controls food intake and energy balance via NPY neurons
Source: PubMed Central journal article supplement — Mol Metab. 2017 Apr 12;6(6):574–84. doi: 10.1016/j.molmet.2017.03.013 (PMC5444095; doi:10.1016/j.molmet.2017.03.013), 2017-04-12

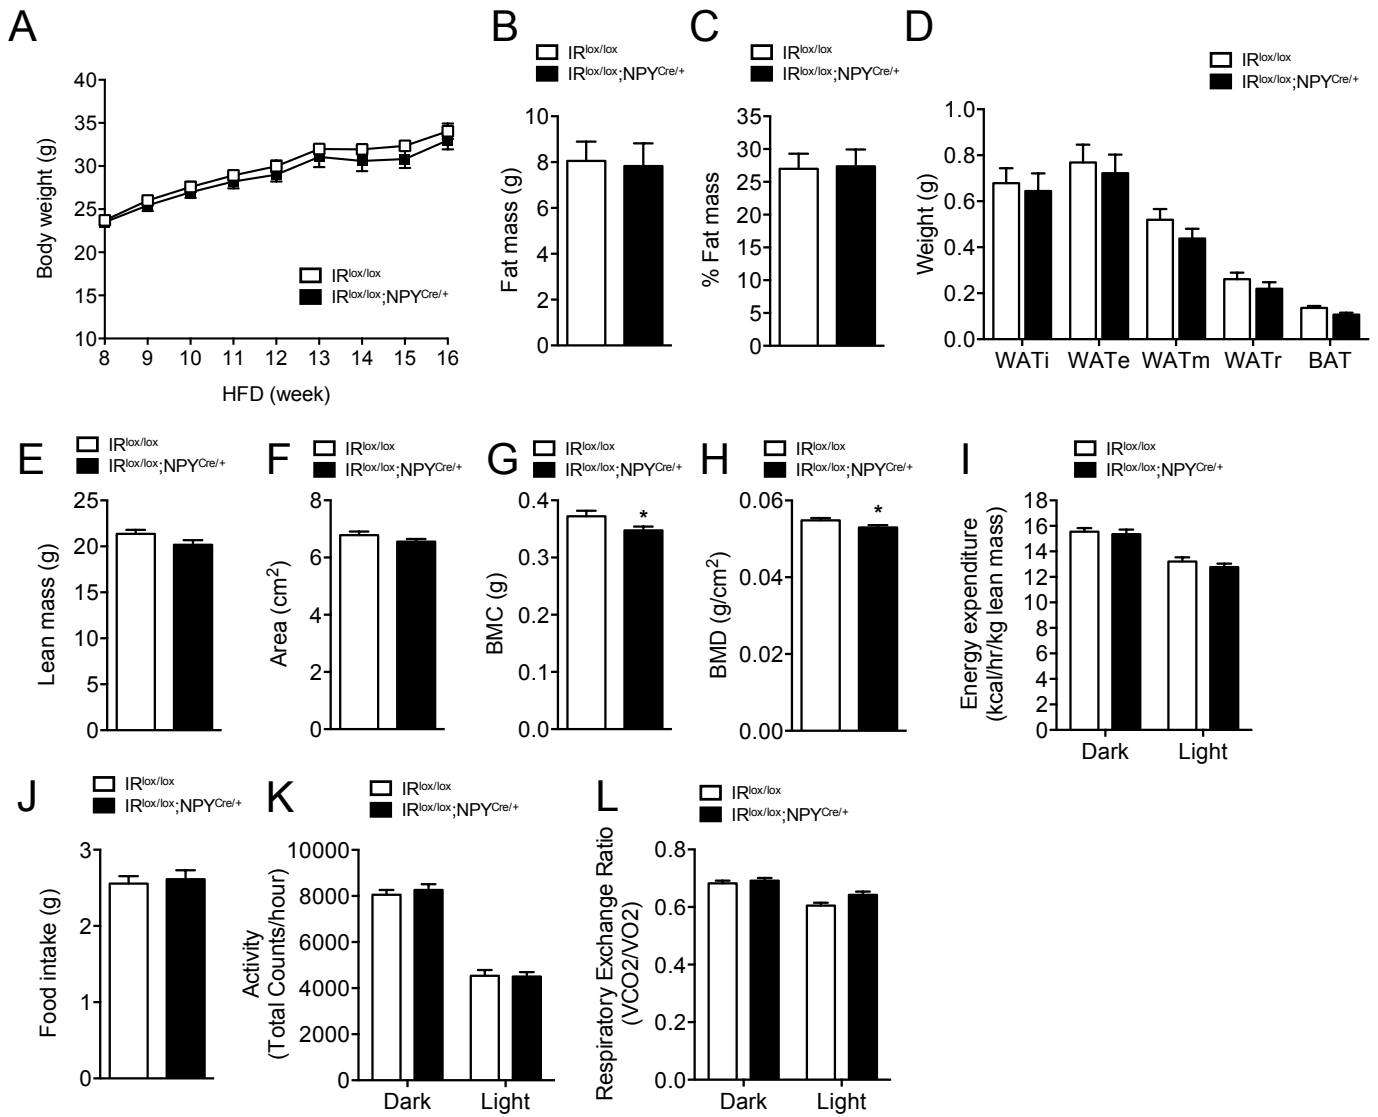

SUPPLEMENTAL FIGURE 3

Supplement: mmc4.pdf [file mmc4.pdf]
